# Supplementary material
Source: publisher figshare collection journal article supplement (https://asha.figshare.com/articles/dataset/_/14378948)
Supplement: Supplementary file 1 [file 2]

**Supplemental Material S3.** Number of speech-language pathologists surveyed in relation to estimated population for each Australian state/territory.

| State                        | Number of members per state (data from SPA as at June 2018) | Estimated number of qualified SLPs per state (83% of SLPs are registered with SPA) | Estimated number of SLPs working with children aged 4-12 years (53% of all SLPs) | Number of survey respondents who indicated they work with children aged 4-12 years | SLP participation rate expressed as number of SLPs who participated in the survey against estimated number of SLPs working with children aged 5-12 years (expressed as percentage) |
|------------------------------|-------------------------------------------------------------|------------------------------------------------------------------------------------|----------------------------------------------------------------------------------|------------------------------------------------------------------------------------|------------------------------------------------------------------------------------------------------------------------------------------------------------------------------------|
| Australian Capital Territory | 78                                                          | 94                                                                                 | 50                                                                               | 15                                                                                 | 30.1%                                                                                                                                                                              |
| New South Wales              | 2,160                                                       | 2,602                                                                              | 1379                                                                             | 135                                                                                | 9.8%                                                                                                                                                                               |
| Northern Territory           | 43                                                          | 52                                                                                 | 27                                                                               | 11                                                                                 | 40.1%                                                                                                                                                                              |
| Queensland                   | 1,559                                                       | 1,878                                                                              | 996                                                                              | 144                                                                                | 14.5%                                                                                                                                                                              |
| South Australia              | 586                                                         | 706                                                                                | 374                                                                              | 46                                                                                 | 12.3%                                                                                                                                                                              |
| Tasmania                     | 108                                                         | 130                                                                                | 69                                                                               | 14                                                                                 | 20.3%                                                                                                                                                                              |
| Victoria                     | 1,882                                                       | 2,267                                                                              | 1202                                                                             | 93                                                                                 | 7.7%                                                                                                                                                                               |
| Western Australia            | 803                                                         | 967                                                                                | 513                                                                              | 67                                                                                 | 13.1%                                                                                                                                                                              |
| <b>Totals</b>                | <b>7,219</b>                                                | <b>8,698</b>                                                                       | <b>4,610</b>                                                                     | <b>525</b>                                                                         | <b>11.4%</b>                                                                                                                                                                       |
